# Supplementary material for: Fluoxetine Increases the Expression of miR-572 and miR-663a in Human Neuroblastoma Cell Lines
Source: PLoS One. 2016 Oct 7;11(10):e0164425. doi: 10.1371/journal.pone.0164425 (PMC5055328; doi:10.1371/journal.pone.0164425)
Supplement: S3 File — (XLSX) [file pone.0164425.s003.xlsx]

## Sheet: SK FT confir
Sample ID	SNORD-95	miR-320a	DCt	2-DCt	DDCt	2-DDCt		miR-489	DCt	2-DCt	DDCt	2-DDCt		miR-572	DCt	2-DCt	DDCt	2-DDCt		miR-663a	DCt	2-DCt	DDCt	2-DDCt
Fluox 10 uM-1	20.3627	22.1697	1.807	0.285784				26.1599	5.79717	0.0179837				26.6276	6.26483	0.0130046				26.9686	6.60583	0.0102671
Fluox 10 uM-2	19.5655	21.4406	1.87502	0.272622				25.7826	6.21701	0.0134429				25.8602	6.29465	0.0127386				26.3546	6.78909	0.0090423
Fluox 10 uM-3	20.0538	21.6542	1.60038	0.329791				25.8347	5.78089	0.0181878				26.4337	6.37985	0.0120081				26.657	6.60314	0.0102862
Fluox 10 uM-4	20.1343	21.8504	1.71611	0.304367				26.3172	6.1829	0.0137646				26.5156	6.38131	0.011996				26.923	6.7887	0.00904475
Fluox 10 uM-5	19.4565	21.1667	1.71021	0.305616				25.7604	6.30391	0.0126571				25.5182	6.06166	0.0149712				26.036	6.57952	0.010456
Fluox 10 uM-6	19.1334	21.3414	2.20794	0.216444				25.8078	6.67441	0.00979043				25.4333	6.29988	0.0126925				25.9351	6.80166	0.0089639
Mean			1.81944	0.285771					6.15938	0.0143044					6.28036	0.0129019					6.69466	0.00967671
SE										0.00132591						0.000446573						0.000296497
DMSO 10 uM-1	19.7379	21.6479	1.91002	0.26609				26.0486	6.31072	0.0125975				27.1662	7.42829	0.0058058				27.6078	7.86992	0.00427482
DMSO 10 uM-2	19.2525	21.2584	2.00589	0.248981				25.856	6.60347	0.0102839				26.8283	7.57577	0.00524163				27.1309	7.87838	0.00424983
DMSO 10 uM-3	19.7769	21.7926	2.01569	0.247296				26.1548	6.37796	0.0120238				27.4484	7.67156	0.0049049				27.5139	7.73699	0.00468742
DMSO 10 uM-4	19.6028	21.8041	2.20123	0.217453				25.7016	6.0988	0.0145908				27.1937	7.59091	0.00518691				27.2626	7.65981	0.00494502
DMSO 10 uM-5	19.5273	21.5935	2.0662	0.238787				25.9523	6.425	0.0116381				26.8204	7.29311	0.00637609				27.0622	7.53493	0.00539213
DMSO 10 uM-6	19.1556	21.1717	2.01613	0.24722				25.6299	6.47433	0.0112469				25.9503	6.79465	0.00900753				26.2502	7.09455	0.00731692
Mean			2.03586	0.244304	-0.216417	1.16184			6.38171	0.0120635	-0.222334	1.16662			7.39238	0.00608714	-1.11202	2.16148			7.6291	0.00514436	-0.934437	1.91114
SE										0.000596898						0.000622208						0.000468551
t test				0.0370289						0.154307						4.58456e-06						9.74725e-06

## Sheet: Summary
miRNA	Autism serum	Fluox 10
		2-DDCt	p
miR-320a	Down	1.162	0.037
miR-489	Down	1.167	0.154
miR-572	Down	2.161	4.58456e-06
miR-663a	Down	1.911	9.74725e-06
