# Supplementary material for: Fluoxetine Increases the Expression of miR-572 and miR-663a in Human Neuroblastoma Cell Lines
Source: PLoS One. 2016 Oct 7;11(10):e0164425. doi: 10.1371/journal.pone.0164425 (PMC5055328; doi:10.1371/journal.pone.0164425)
Supplement: S4 File — (XLSX) [file pone.0164425.s004.xlsx]

## Sheet: Sh FT confir
Sample ID	SNORD-95	miR-320a	DCt	2-DCt	DDCt	2-DDCt		miR-489	DCt	2-DCt	DDCt	2-DDCt		miR-572	DCt	2-DCt	DDCt	2-DDCt		miR-663a	DCt	2-DCt	DDCt	2-DDCt
Flox 10 uM-1	19.9756	21.2913	1.31576	0.401713				25.7499	5.77437	0.0182701				25.6238	5.64827	0.0199389				26.8955	6.9199	0.0082585
Flox 10 uM-2	20.2627	21.4053	1.14257	0.452951				25.8322	5.5695	0.0210579				25.5923	5.32964	0.0248667				27.2045	6.94179	0.00813417
Flox 10 uM-3	20.0585	21.0509	0.992427	0.502632				25.7797	5.72125	0.0189554				25.418	5.35958	0.0243559				27.229	7.17052	0.0069416
Flox 10 uM-4	19.9565	21.245	1.28847	0.409385				25.6712	5.71469	0.0190417				25.2102	5.25364	0.0262117				26.9679	7.01139	0.00775104
Flox 10 uM-5	20.1665	21.4237	1.25724	0.418344				26.0269	5.86044	0.0172121				25.1684	5.00191	0.0312087				27.2519	7.08544	0.00736328
Flox 10 uM-6	19.9553	21.4846	1.5293	0.346446				25.756	5.8007	0.0179396				25.1983	5.24304	0.0264051				26.694	6.73868	0.00936387
Mean			1.25429	0.421912					5.74016	0.0187461					5.30601	0.0254978					6.97795	0.00796875
SE										0.000538695						0.00148942						0.000342866
DMSO 10 uM-1	19.8324	21.128	1.29562	0.407362				25.9387	6.1063	0.0145151				26.8317	6.99932	0.0078162				27.8611	8.0287	0.00382931
DMSO 10 uM-2	20.1365	21.3318	1.19529	0.436699				26.1689	6.03233	0.0152787				27.0712	6.93462	0.0081747				28.1694	8.0329	0.00381818
DMSO 10 uM-3	19.9258	21.3747	1.44882	0.36632				25.7374	5.81153	0.0178055				27.252	7.32612	0.00623188				27.8349	7.90902	0.00416051
DMSO 10 uM-4	19.8534	21.2925	1.43911	0.368794				26.0759	6.22254	0.0133915				27.1264	7.27307	0.00646529				27.9463	8.09294	0.00366253
DMSO 10 uM-5	20.0871	21.5955	1.50846	0.351487				25.8913	5.80422	0.017896				26.9226	6.83547	0.00875624				27.9506	7.8635	0.0042939
DMSO 10 uM-6	19.7865	21.4205	1.63404	0.322185				25.8235	6.03707	0.0152286				26.8274	7.04094	0.00759391				27.4565	7.67007	0.00490996
Mean			1.42022	0.375474	-0.165928	1.12189			6.00233	0.0156859	-0.262174	1.19928			7.06826	0.00750637	-1.76224	3.39225			7.93286	0.0041124	-0.954902	1.93845
SE										0.000739082						0.00040086						0.00018623
t test				0.117592						0.00741406						3.81274e-07						1.76951e-06

## Sheet: Summary
miRNA	10
	2-DDCt	p
miR-320a	1.122	0.118
miR-489	1.2	0.007
miR-572	3.392	3.81274e-07
miR-663a	1.94	1.76951e-06
